# Supplementary material
Source: PubMed Central journal article supplement (PMC1390686)
Supplement: nar_34_5_e35__1.pdf [file nar_34_5_e35__1.pdf]

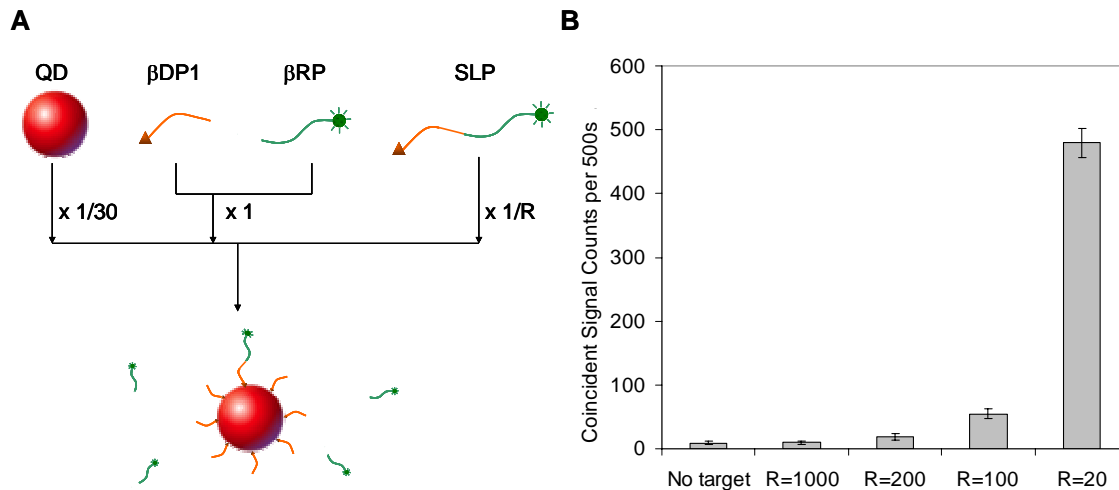

**Supplementary Figure 1.** (A) Detection of ligation products in a large excess of unligated probes. A 32bp synthetic ligation product (SLP), which was 5'-end biotinylated and 3'-end labeled with OG488, was used to mimic the ligation products. Sequence of SLP: Biotin – GTG CAC CTG ACT CCT GAG GAG AAG TCT GCC GT – OG488. Sequence of biotinylated discrimination probes ( $\beta$ DP1): Biotin – GTG CAC CTG ACT CCT G. Sequence of Oregon Green 488 labeled reporter probes ( $\beta$ RP): p AGG AGA AGT CTG CCG T – OG488. Ratio between probes and QD was kept at 30. The concentrations of the  $\beta$ DP1 and  $\beta$ RP probes were kept the same and  $R$  is the concentration ratio between the probes and SLPs. (B) Results of detecting synthetic ligation products in a varying excess of unligated probes. SLPs can be detected in a 200-fold excess of unligated probes ( $R=200$ ). The detection time was 500 sec and error bars represent standard deviations from five measurements.
